# Supplementary material for: Methanogenesis by CO 2 reduction dominates lake sediments with different organic matter compositions
Source: Copernicus journal article supplement (doi:10.5194/egusphere-2025-437), 2025-02-11
Supplement: Supplementary file [file egusphere-2025-437-AC1-supplement.pdf]

## **Response (in bold) to comments by the Referee#1**

This manuscript presents data on the regulation of methanogenesis in two different sediments of Lake Geneva. The authors measured depth profiles of acetoclastic and hydrogenotrophic methanogenesis in sediments from a deep profundal and a shallower deltaic site and related these rates to sediment properties, biomarker abundance and isotope signatures, and the abundance and diversity of the methanogenic community. Despite significant differences in organic matter quantity and quality, and methanogen abundance, the authors found similar methane production rates, similar methanogen community composition and a clear dominance of hydrogenotrophic methanogenesis at both sites.

The manuscript addresses an important research question, presents very interesting and partly surprising data, and the results of the different approaches used provide new insights into the regulation of methanogenesis in lake sediments. The manuscript is well written and the conclusions are supported by the data. I have only a few minor suggestions to improve this very nice and readable manuscript. First, I found the discussion too long. It could be shortened considerably, especially by omitting statements about obvious facts (see examples below). Also, most of the conclusion is a summary of the results. Therefore, the last part of the conclusion can be revised (see below) and combined with the discussion.

**Response: We thank the reviewer for this positive assessment.**

Specific comments:

L45f: Is there another source of methane in lake sediments besides anaerobic decomposition of organic matter?

**Response: Anaerobic decomposition of organic matter is generally the predominant source of methane in lake sediments. However, recent evidence has suggested that many other organisms such as fungi, algae, cyanobacteria and bacteria can produce methane in the presence of oxygen. For example, Ernst et al demonstrated that methane formation by *Bacillus subtilis* and *Escherichia coli* was triggered by free iron and reactive oxygen species (Ernst, L. and others. 2022. Methane formation driven by reactive oxygen species across all living organisms. *Nature* 603: 482–487. doi:10.1038/s41586-022-04511-9). We have no reason to assume, however, that these processes play any significant role in the studied sediments. Now, in the revised manuscript, we write “Although recent**

evidence suggests that various living organisms can produce methane under oxic conditions (Ernst et al., 2022), most CH<sub>4</sub> in lakes is still produced primarily during the anaerobic decomposition of organic carbon (OC) in sediments,....” (Line 45-48)

L77ff: This is a very long sentence that I had to read several times to understand. Perhaps it should be split into two parts.

**Response: Thank you for pointing this out. We have revised the sentence for clarity and split it into two shorter sentences (Now at lines 78–84)**

L98: There are also terrestrial C<sub>4</sub> plants such as maize

**Response: Yes, terrestrial C<sub>4</sub> plants such as maize do indeed use the Calvin-Benson cycle (also known as the C<sub>3</sub> pathway), but only after initially concentrating CO<sub>2</sub> through the C<sub>4</sub> pathway, this CO<sub>2</sub>-concentrating mechanism is what leads to their characteristically higher (less negative)  $\delta^{13}\text{C}$  values compared to C<sub>3</sub> plants. However, land cover in the Lake Geneva catchment is predominantly composed of temperate forests, grasslands, and pastures, which are overwhelmingly dominated by C<sub>3</sub> vegetation. While C<sub>4</sub> crops like maize may be cultivated in parts of the region, their spatial extent is limited, and there is currently no evidence suggesting that they contribute significantly to the terrestrial organic matter input into the lake. To avoid any imprecision, we refer specifically to terrestrial C<sub>3</sub> plants rather than terrestrial plants in general.**

L273ff: What components have been quantified with this method?

**Response: We provided details regarding the quantified components in the Supplementary Information (Table S2). Briefly, we quantified organic compounds such as n-alkanes, n-alkenes, carbohydrates, N compounds, Phenols and lignin oligomers, and (poly)aromatics.**

L291ff: Please explain which depths were chosen and why.

**Response:** The depth information (1, 5, 11, 19, and 29 cm) has now been added to clarify our rationale for selecting these specific intervals. The surface sediment (1 cm) represents the oxic-to-suboxic zone, characterized by fresh organic matter input and active early diagenetic processes. Depths of 5 cm and 19 cm were chosen because they correspond to the highest total organic carbon (TOC) concentrations at the two study sites. Depths 11 cm and 29 cm were selected based on elevated methanogenesis rates. Together, these depths also provide a representative vertical distribution across the sediment profile. In the manuscript, now it reads: "At both sites, sediment samples from five depths (1, 5, 11, 19, and 29 cm) were selected based on redox conditions, organic carbon content, and methanogenesis rates, then lyophilized and homogenized for subsequent lipid extraction." (Lines 302-304)

L350: 'below' I could not find any information about methanogenic rates or the depths at which samples were taken. Please explain what depths were sampled for DNA extraction.

**Response:** We have clarified the exact depths at which DNA samples were taken. Now it writes "DNA was extracted from selected sediment samples of Lake Geneva, where both high and low methanogenic activity were detected (DS: 11, 19, 21 and 27 cm; PS: 5, 11, 19, and 29 cm), using FastDNA SPIN Kit for Soils (MP Biomedicals) following the manufacturer's instructions."

L374: The section on statistics is missing.

**Response:** We thank the reviewer for pointing this out. A new subsection detailing the statistical analyses has been added at the end of section 2.10. *Quantitative PCR (qPCR)*; specifically "We further compared the absolute gene copy numbers of *mcrA* between the two sites using the Wilcoxon signed-rank test ('wilcox.test'), as implemented in the R package 'stats' (R Core Team, 2024).".

L484: The difference between the  $\delta^{13}\text{C}$  values of  $\text{CH}_4$  and TIC is about 60, please explain in the M&M section how the fractionation factor was approximated.

**Response: We have now included an explanation in the M&M section (2.4. *Pore water methane and nutrient analyses*) of how the isotope effect was calculated (Lines 245–249).**

L505ff: The second part of this paragraph should be in the discussion.

**Response: We agree with the reviewer's suggestion and have moved the latter part of the paragraph to the Discussion section. We also made minor deletions to enhance conciseness (Lines 686–689).**

L681: typo: methanogenesis

**Response: Corrected.**

L710f: What is meant by "low" in this context? The concentration of acetate seems to be higher than the concentration of any other low molecular weight fatty acid at the DS site. Also, it's difficult to infer the importance of an intermediate from its concentrations. "Low" concentrations may be due to high rates of degradation or low rates of production.

**Response: We agree that "low" was imprecise. The sentence has been rephrased and now it reads "The acetate concentrations were below 26  $\mu\text{M}$  at both sites". This is now at Line 743 in the revised manuscript.**

L739ff: This is a rather obvious statement that is probably not needed.

**Response: We have removed this statement in the revised manuscript to improve conciseness.**

L782ff: This is a very general statement. However, it could not be supported by the current study.

**Response: Thank you for pointing this out. We agree that the statement was too broad and not directly supported by our data. To avoid overinterpretation and ensure consistency with our findings, we have removed it.**

L815ff: This is obvious since H<sub>2</sub> and acetate are the main substrates of methanogenesis, not sedimentary organic matter.

**Response: We agree with the reviewer. However, sedimentary organic matter plays a critical role as the precursor for the production of H<sub>2</sub> and acetate, the main substrates for methanogenesis. In the manuscript, we revised the sentence as follows to incorporate the role of sedimentary organic matter: "Instead, other environmental factors such as substrate availability or microbial community dynamics may influence methane production, though the specific mechanisms remain uncertain. For example, sedimentary organic matter plays a critical role as the precursor for the production of H<sub>2</sub> and acetate, the main substrates for methanogenesis." (Lines 810-814)**

Fig. 1 and Fig. 4: The acetate and DIC concentration profiles should be shown only once. In addition, the lines and symbols of different data should be changed to better differentiate between different parameters.

**Response: We have removed the profiles for acetate and DIC (i.e., panels A and D) from the original Fig. 4. In addition, we have also adjusted the line styles and symbols in both Fig. 1 and Fig. 4 for clarity and consistency.**

Fig. 5: Please align the methanogen groups with the ticks of the respective columns.

**Response: We have corrected the alignment of methanogen groups with the axis ticks in Fig. 5.**
